# Supplementary material for: The performance of an atomically dispersed oxygen reduction catalyst prepared by γ-CD-MOF integration with FePc
Source: Royal Society of Chemistry journal article supplement (doi:10.1039/d2na00095d), 2022-01-01
Supplement: d2na00095d1.pdf [file d2na00095d1.pdf]

## Supporting Information

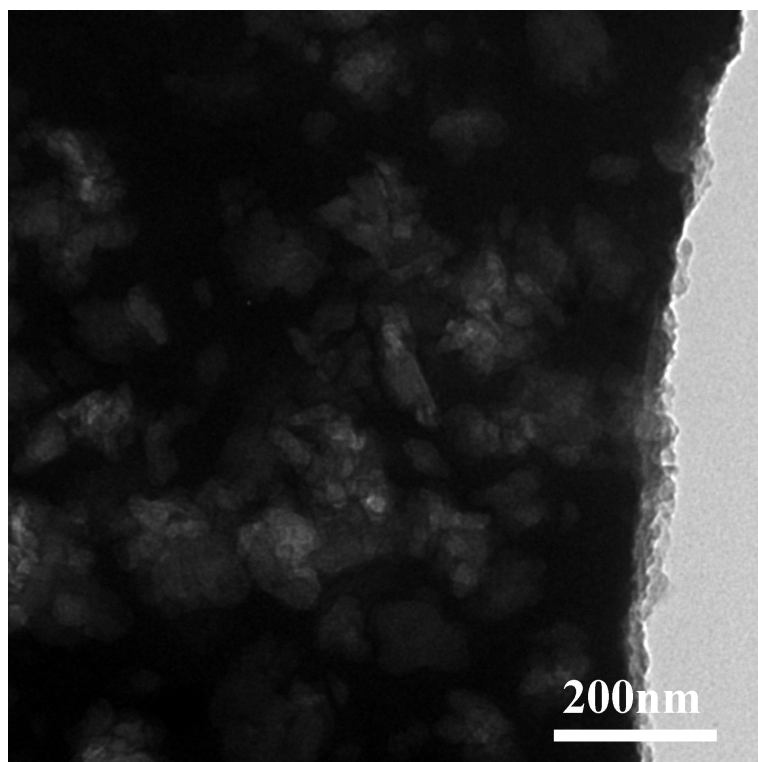

Fig. S1 TEM image of FePc@CD/M (1:20)-1000.

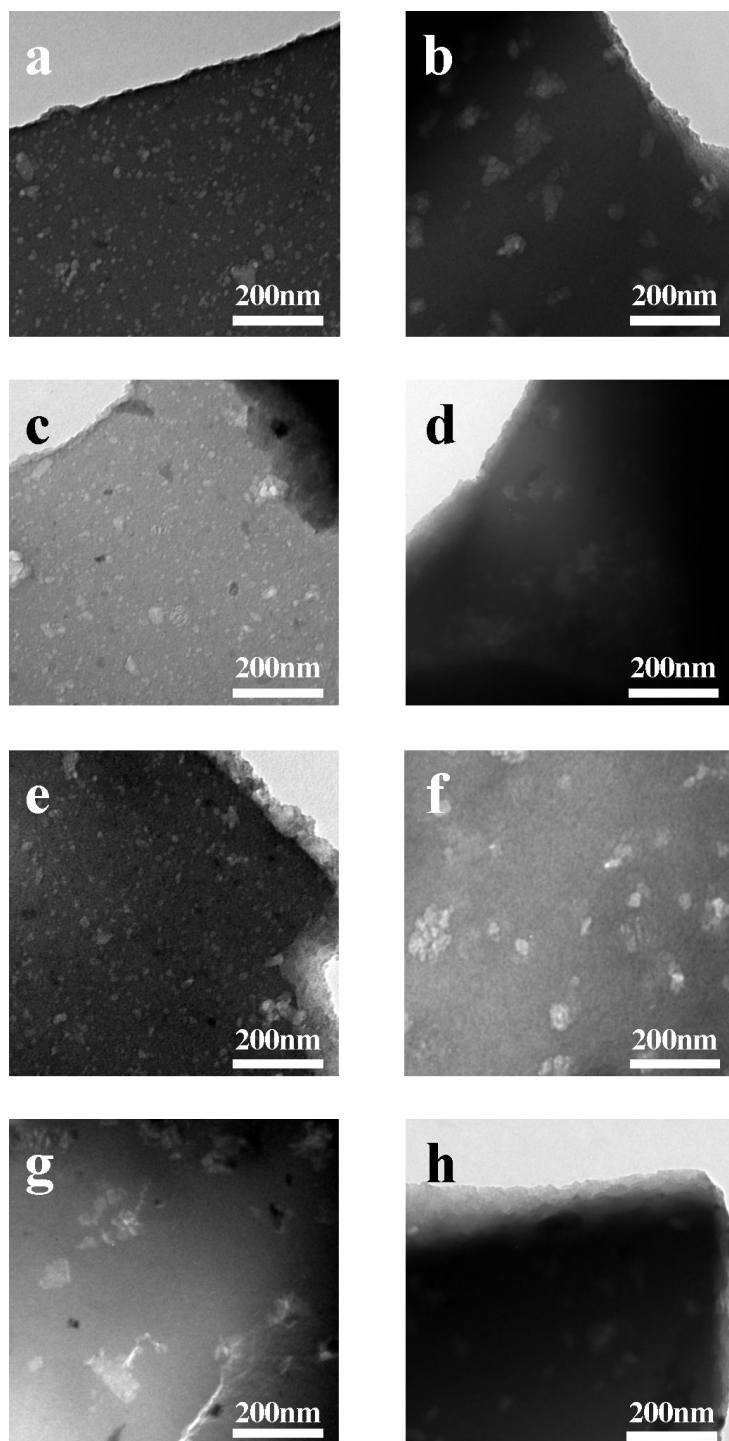

Fig. S2 TEM image of a) FePc@CD/M (1:0)-1000, b) FePc@CD/M (1:10)-1000, c) FePc@CD/M (1:15)-1000, d) FePc@CD/M (1:25)-1000, e) FePc@CD/M (1:30)-1000, f) FePc@CD/M (1:20)-800, g) FePc@CD/M (1:20)-900, h) FePc@CD/M (1:20)-1100.

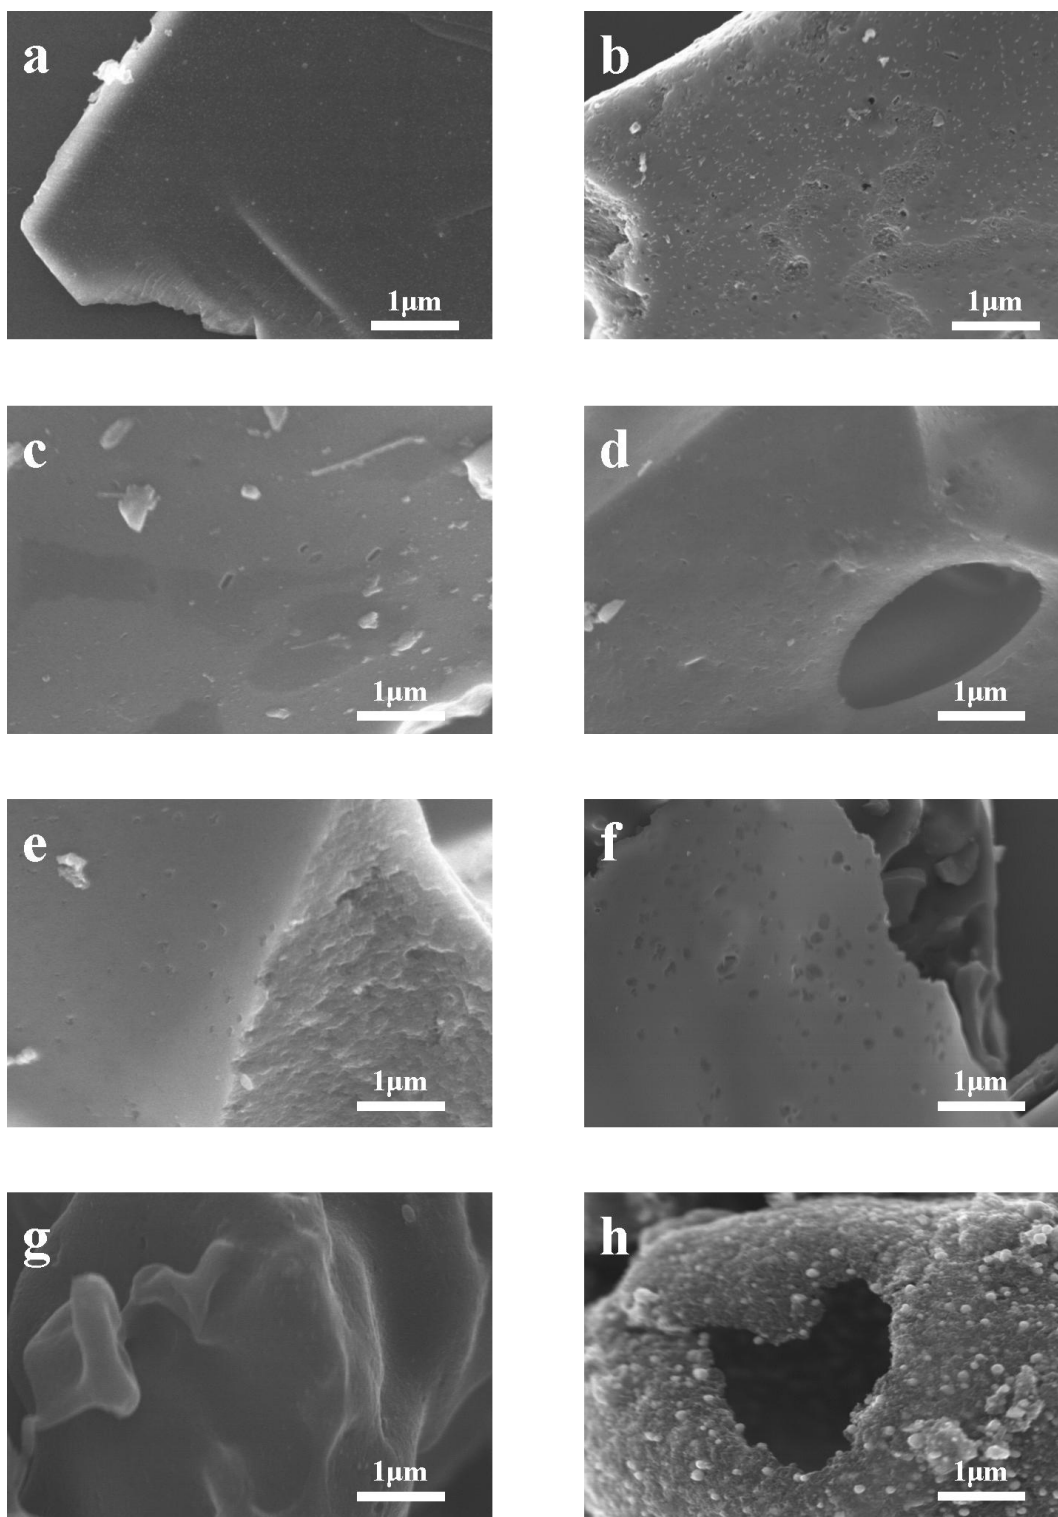

Fig. S3 SEM image of a) FePc@CD/M (1:0)-1000, b) FePc@CD/M (1:10)-1000, c) FePc@CD/M (1:15)-1000, d) FePc@CD/M (1:25)-1000, e) FePc@CD/M (1:30)-1000, f) FePc@CD/M (1:20)-800, g) FePc@CD/M (1:20)-900, h) FePc@CD/M (1:20)-1100.

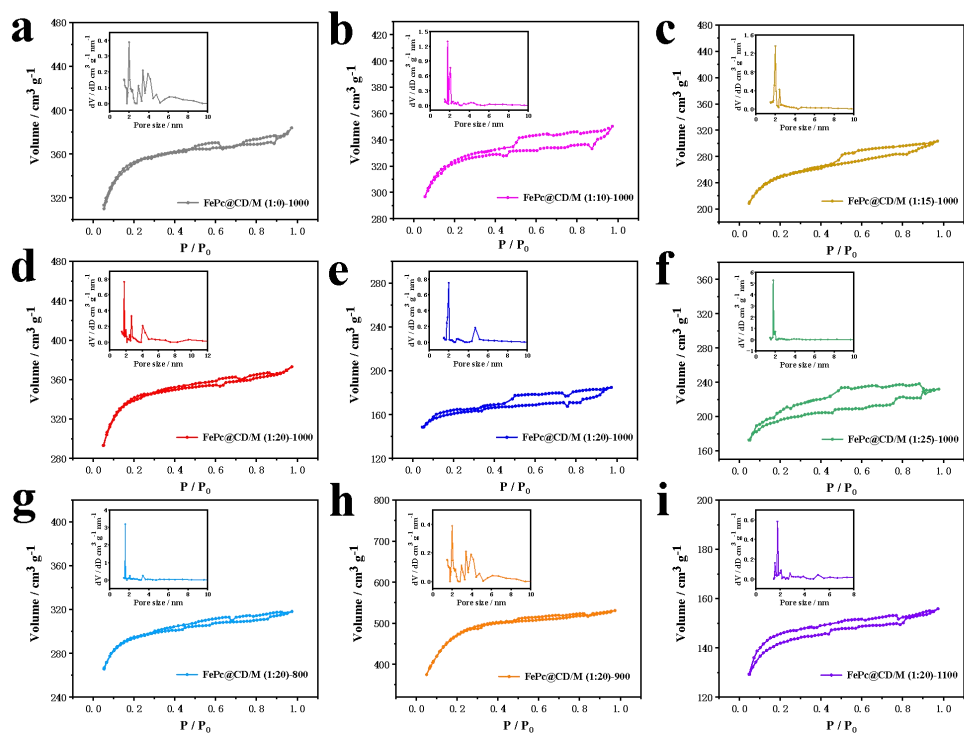

Fig. S4 N<sub>2</sub> adsorption–desorption curves of all catalysts.

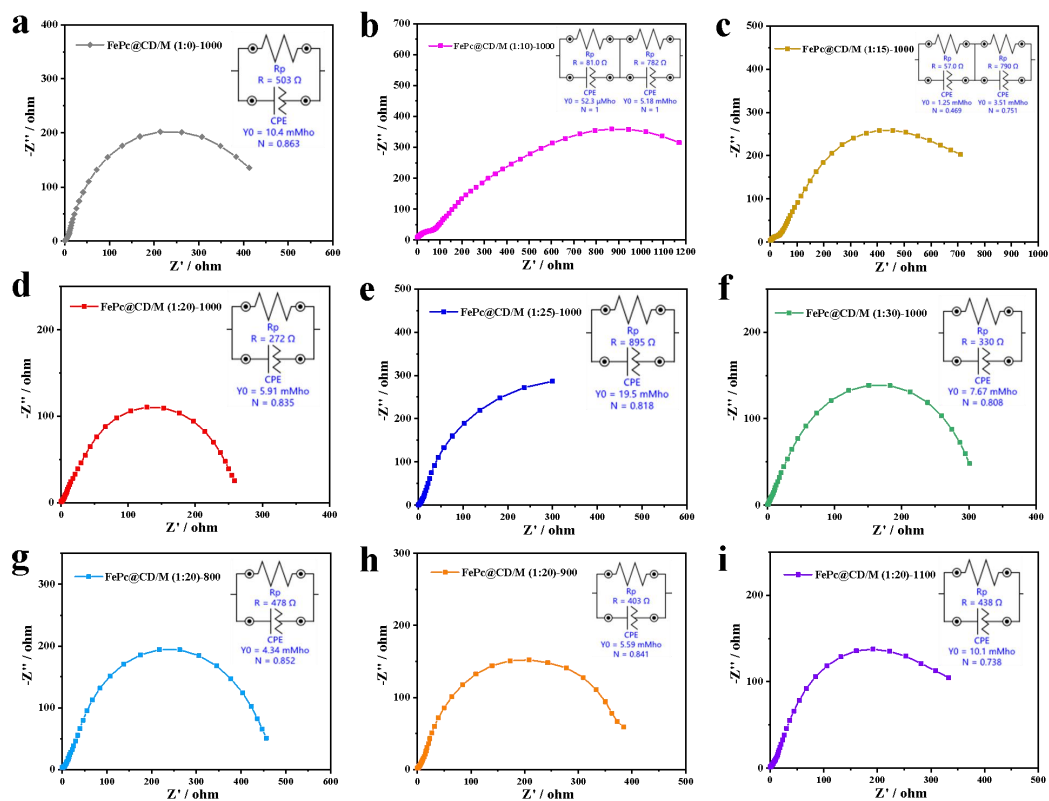

Fig. S5 The Nyquist diagram and equivalent circuit of a) FePc@CD/M (1:0)-1000, b) FePc@CD/M (1:10)-1000, c) FePc@CD/M (1:15)-1000, d) FePc@CD/M (1:20)-1000, e) FePc@CD/M (1:25)-1000, f) FePc@CD/M (1:30)-1000, g) FePc@CD/M (1:20)-800, h) FePc@CD/M (1:20)-900, i) FePc@CD/M (1:20)-1100.

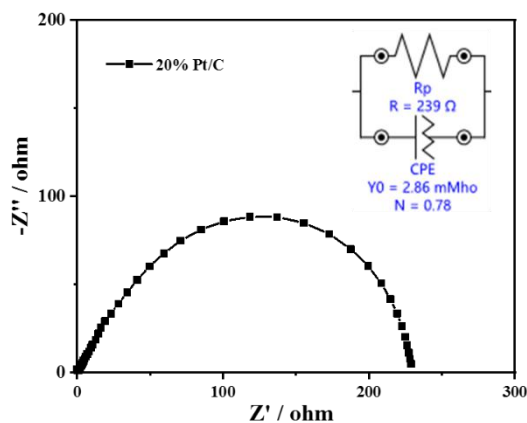

Fig. S6 The Nyquist diagram and equivalent circuit of 20% Pt/C.

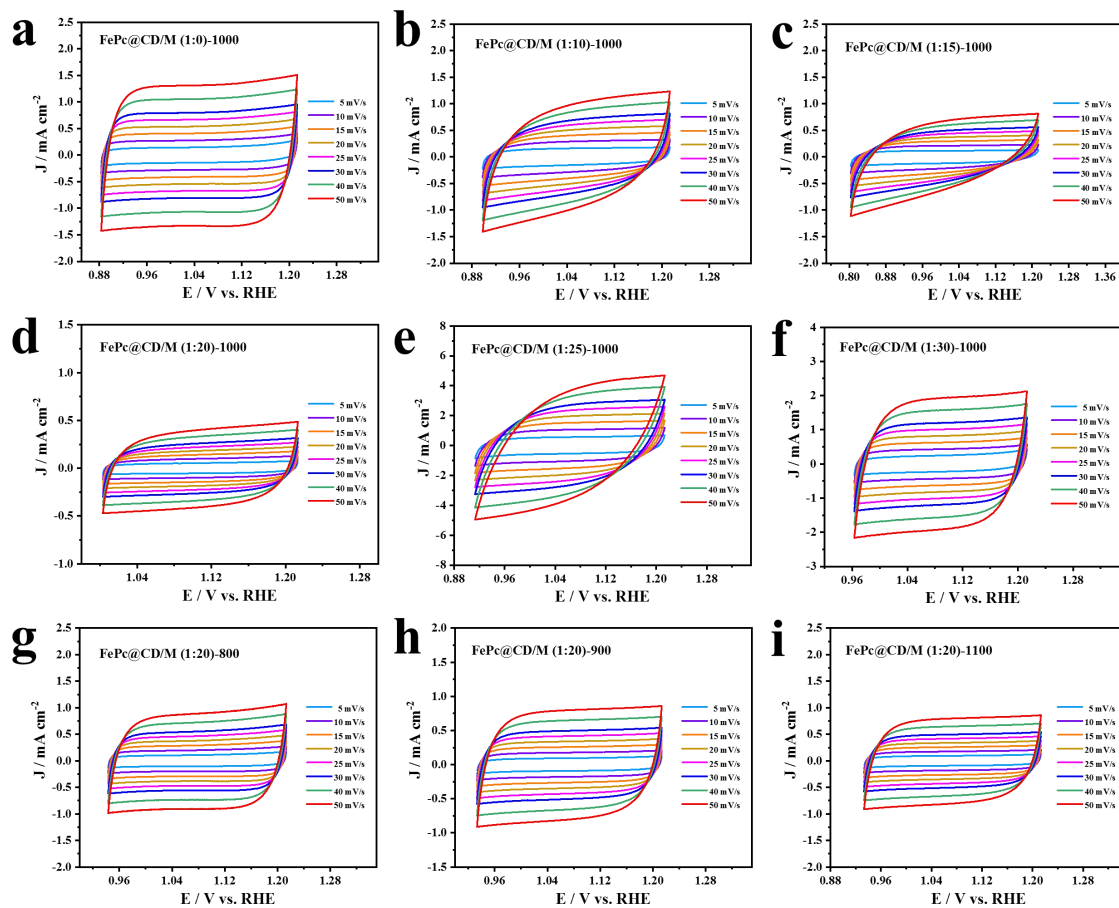

Fig. S7 Cyclic voltammograms in the region without faradaic processes with different scan rates of a) FePc@CD/M (1:0)-1000, b) FePc@CD/M (1:10)-1000, c) FePc@CD/M (1:15)-1000, d) FePc@CD/M (1:20)-1000, e) FePc@CD/M (1:25)-1000, f) FePc@CD/M (1:30)-1000, g) FePc@CD/M (1:20)-800, h) FePc@CD/M (1:20)-900, i) FePc@CD/M (1:20)-1100.

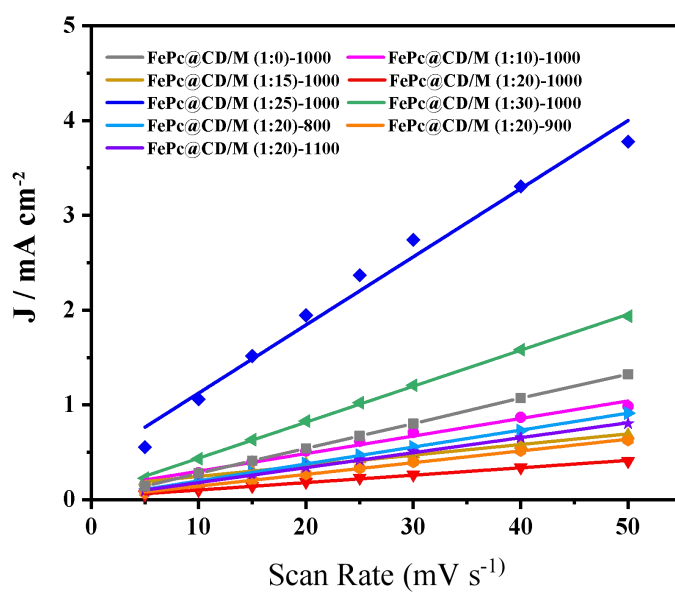

Fig. S8 Capacitive currents as a function of the scan rate of all samples.

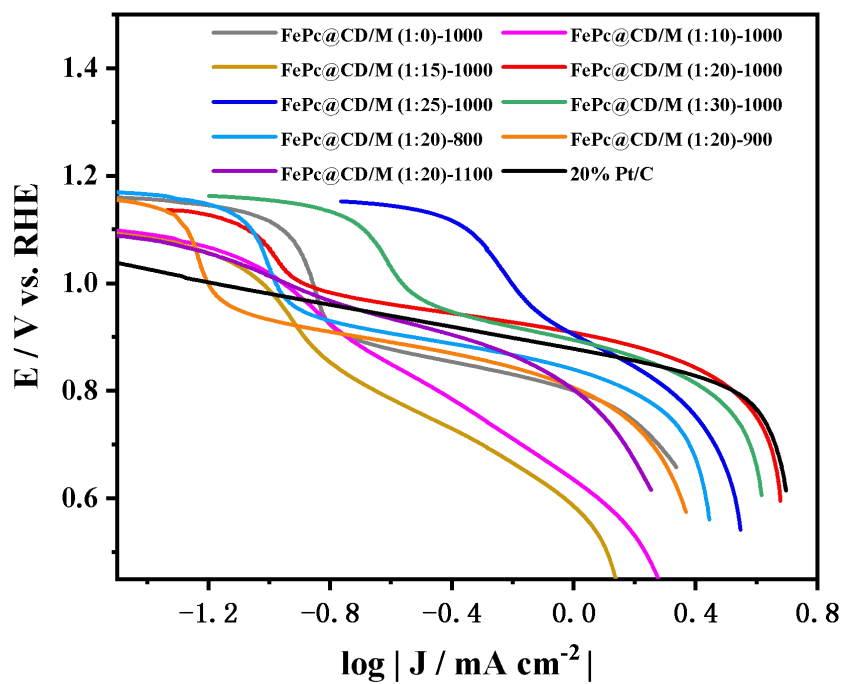

Fig. S9 Tafel plots of all samples and 20% Pt/C.

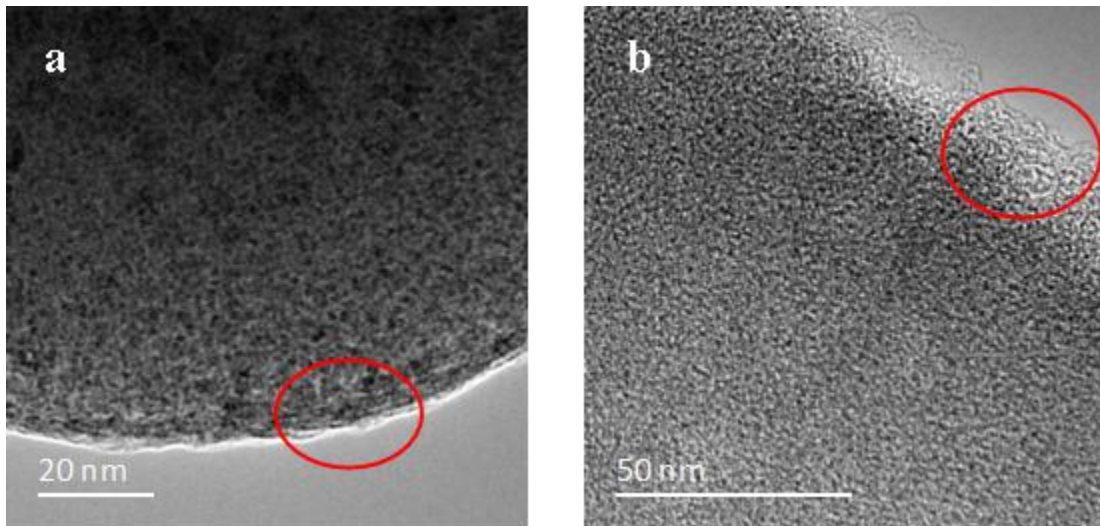

Fig. S10 (a) and (b)HRTEM image of FePc@CD/M (1:20)-1000.



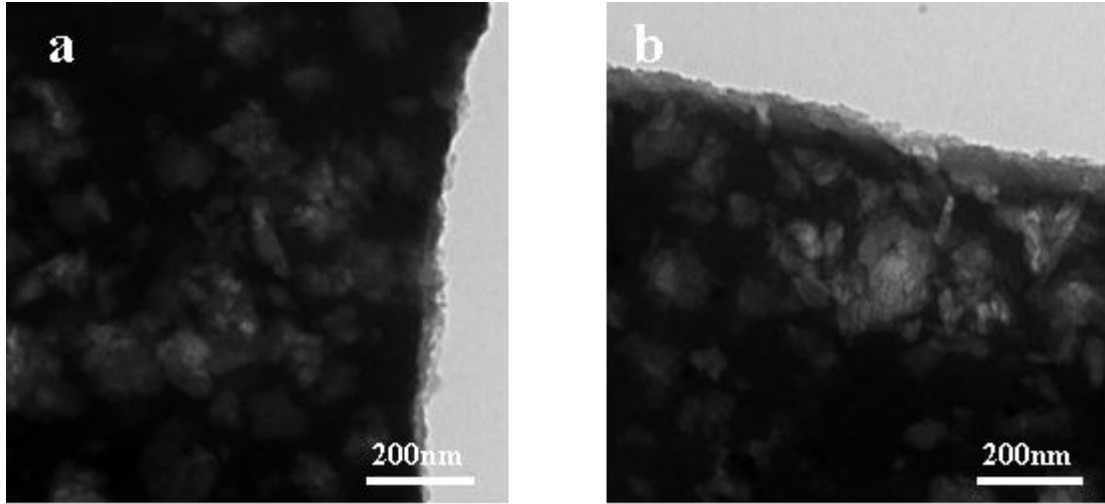

Fig. S11 (a)TEM image of FePc@CD/M (1:20)-1000 before CA test. (b)TEM image of FePc@CD/M (1:20)-1000 after CA test.

Table S1. The BET surface area and pore volume of all samples.

| <b>Sample</b>         | <b>BET surface area<br/>(m<sup>2</sup>g<sup>-1</sup>)</b> | <b>Micropore volume<br/>(cm<sup>3</sup>g<sup>-1</sup>)</b> |
|-----------------------|-----------------------------------------------------------|------------------------------------------------------------|
| FePc@CD/M (1:0)-1000  | 492.599                                                   | 0.068                                                      |
| FePc@CD/M (1:10)-1000 | 977.297                                                   | 0.054                                                      |
| FePc@CD/M (1:15)-1000 | 786.376                                                   | 0.106                                                      |
| FePc@CD/M (1:20)-1000 | 1055.317                                                  | 0.060                                                      |
| FePc@CD/M (1:25)-1000 | 645.412                                                   | 0.049                                                      |
| FePc@CD/M (1:30)-1000 | 608.612                                                   | 0.077                                                      |
| FePc@CD/M (1:20)-800  | 902.359                                                   | 0.049                                                      |
| FePc@CD/M (1:20)-900  | 1510.607                                                  | 0.093                                                      |
| FePc@CD/M (1:20)-1100 | 435.745                                                   | 0.023                                                      |

Table S2. Deconvolution of C1s XPS spectra

| Sample                | C=C   | C-O/C=N | C-N  | O-C=C |
|-----------------------|-------|---------|------|-------|
| FePc@CD/M (1:0)-1000  | 72.72 | 16.42   | 4.04 | 6.82  |
| FePc@CD/M (1:10)-1000 | 77.66 | 15.34   | 4.57 | 2.43  |
| FePc@CD/M (1:15)-1000 | 80.08 | 12.86   | 5.79 | 1.27  |
| FePc@CD/M (1:20)-1000 | 72.84 | 18.13   | 4.88 | 4.16  |
| FePc@CD/M (1:25)-1000 | 82.59 | 12.62   | 4.12 | 0.68  |
| FePc@CD/M (1:30)-1000 | 65.63 | 21.23   | 7.28 | 5.86  |
| FePc@CD/M (1:20)-800  | 64.23 | 17.20   | 9.94 | 8.63  |
| FePc@CD/M (1:20)-900  | 74.16 | 17.84   | 5.89 | 2.11  |
| FePc@CD/M (1:20)-1100 | 75.46 | 16.02   | 6.14 | 2.38  |

Table S3. Deconvolution of N1s XPS spectra

| Sample                | N content (at%) | Pyridinic-N (%) | Fe-N (%) | pyrrolic-N (%) | graphitic-N (%) | oxidized-N (%) |
|-----------------------|-----------------|-----------------|----------|----------------|-----------------|----------------|
| FePc@CD/M (1:0)-1000  | 2.71            | 12.41           | 0.00     | 41.01          | 31.90           | 14.68          |
| FePc@CD/M (1:10)-1000 | 1.84            | 3.30            | 9.83     | 15.52          | 39.70           | 31.65          |
| FePc@CD/M (1:15)-1000 | 1.88            | 7.47            | 17.54    | 23.96          | 40.20           | 10.82          |
| FePc@CD/M (1:20)-1000 | 4.39            | 15.01           | 16.36    | 18.15          | 41.82           | 8.66           |
| FePc@CD/M (1:25)-1000 | 2.4             | 5.11            | 25.90    | 30.29          | 36.35           | 2.35           |
| FePc@CD/M (1:30)-1000 | 2.22            | 4.34            | 13.89    | 2.84           | 36.79           | 42.13          |
| FePc@CD/M (1:20)-800  | 11.14           | 24.47           | 19.12    | 23.69          | 16.99           | 15.72          |
| FePc@CD/M (1:20)-900  | 3.82            | 3.78            | 13.22    | 2.77           | 71.18           | 9.06           |
| FePc@CD/M (1:20)-1100 | 1.57            | 6.02            | 3.61     | 8.65           | 33.35           | 48.37          |

**Table S4** Summary of performance for ORR in 0.1 M KOH.

| Catalysts                    | E <sub>onset</sub><br>(V vs. RHE) | E <sub>1/2</sub><br>(Vs. RHE) | Reference        |
|------------------------------|-----------------------------------|-------------------------------|------------------|
| <b>FePc@CD/M (1:20)-1000</b> | <b>0.988</b>                      | <b>0.846</b>                  | <b>This work</b> |
| Fe-N-C-900                   | 0.96                              | 0.85                          | [1]              |
| Fe/OES                       | 1.0                               | 0.85                          | [2]              |
| Fe-NCCs                      | /                                 | 0.82                          | [3]              |
| Fe-N/C catalyst              | 0.923                             | 0.81                          | [4]              |
| L-FeNC                       | /                                 | 0.89                          | [5]              |
| Fe-N/C-SAC                   | 0.89                              | /                             | [6]              |
| Fe-ISAs/CN                   | 0.9                               | /                             | [7]              |
| Fe-N-SCCFs                   | 1.03                              | 0.883                         | [8]              |
| Fe SA-NSC-900                | 0.96                              | 0.86                          | [9]              |

Table S5 Detailed data of electrocatalytic properties for the all as-prepared samples compared with 20% Pt/C.

| Sample                | $E_{\text{onset}}$<br>(V vs.RHE) | $E_{1/2}$<br>(V vs.RHE) | $ J $<br>( $\text{mA cm}^{-2}$ ) |
|-----------------------|----------------------------------|-------------------------|----------------------------------|
| FePc@CD/M (1:0)-1000  | 0.912                            | 0.812                   | 3.686                            |
| FePc@CD/M (1:10)-1000 | 0.832                            | /                       | 2.983                            |
| FePc@CD/M (1:15)-1000 | 0.893                            | /                       | 1.987                            |
| FePc@CD/M (1:20)-1000 | 0.988                            | 0.846                   | 4.728                            |
| FePc@CD/M (1:25)-1000 | 0.922                            | 0.833                   | 3.348                            |
| FePc@CD/M (1:30)-1000 | 0.962                            | 0.833                   | 4.608                            |
| FePc@CD/M (1:20)-800  | 0.967                            | 0.818                   | 3.305                            |
| FePc@CD/M (1:20)-900  | 0.976                            | 0.812                   | 2.931                            |
| FePc@CD/M (1:20)-1100 | 0.928                            | /                       | 3.099                            |
| 20% Pt/C              | 0.985                            | 0.822                   | 5.323                            |

**Table S6** The fitting results of Nyquist diagrams

| Sample                | R <sub>p</sub><br>( Mho )           | Y <sub>0</sub><br>( mMho )            | N     | C<br>( mF ) |
|-----------------------|-------------------------------------|---------------------------------------|-------|-------------|
| FePc@CD/M (1:0)-1000  | 503                                 | 10.4                                  | 0.863 | 11.2        |
| FePc@CD/M (1:10)-1000 | (R <sub>p</sub> <sup>1</sup> ) 81.0 | (Y <sub>0</sub> <sup>1</sup> ) 0.0523 | 1     | 0.0523      |
|                       | (R <sub>p</sub> <sup>2</sup> ) 782  | (Y <sub>0</sub> <sup>2</sup> ) 5.18   | 1     | 5.18        |
| FePc@CD/M (1:15)-1000 | (R <sub>p</sub> <sup>1</sup> ) 57   | (Y <sub>0</sub> <sup>1</sup> ) 1.25   | 0.469 | 0.0628      |
|                       | (R <sub>p</sub> <sup>2</sup> ) 790  | (Y <sub>0</sub> <sup>2</sup> ) 3.51   | 0.751 | 4.92        |
| FePc@CD/M (1:20)-1000 | 272                                 | 5.91                                  | 0.835 | 6.49        |
| FePc@CD/M (1:25)-800  | 895                                 | 19.5                                  | 0.818 | 36.8        |
| FePc@CD/M (1:30)-900  | 330                                 | 7.67                                  | 0.808 | 9.53        |
| FePc@CD/M (1:20)-800  | 478                                 | 4.34                                  | 0.852 | 4.93        |
| FePc@CD/M (1:20)-900  | 403                                 | 5.59                                  | 0.841 | 6.52        |
| FePc@CD/M (1:20)-1100 | 438                                 | 10.1                                  | 0.738 | 17.1        |
| 20% Pt/C              | 239                                 | 2.86                                  | 0.78  | 2.55        |

## References

1. He, Q.; Meng, Y.; Zhang, H.; Zhang, Y.; Sun, Q.; Gan, T.; Xiao, H.; He, X.; Ji, H., Amino-metalloporphyrin polymers derived Fe single atom catalysts for highly efficient oxygen reduction reaction. *Science China Chemistry* **2020**, *63* (6), 810-817.
2. Hou, C. C.; Zou, L.; Sun, L.; Zhang, K.; Liu, Z.; Li, Y.; Li, C.; Zou, R.; Yu, J.; Xu, Q., Single-Atom Iron Catalysts on Overhang-Eave Carbon Cages for High-Performance Oxygen Reduction Reaction. *Angew Chem Int Ed Engl* **2020**, *59* (19), 7384-7389.
3. Jia, N.; Xu, Q.; Zhao, F.; Gao, H.-X.; Song, J.; Chen, P.; An, Z.; Chen, X.; Chen, Y., Fe/N Codoped Carbon Nanocages with Single-Atom Feature as Efficient Oxygen Reduction Reaction Electrocatalyst. *ACS Applied Energy Materials* **2018**, *1* (9), 4982-4990.
4. Lin, L.; Zhu, Q.; Xu, A. W., Noble-metal-free Fe-N/C catalyst for highly efficient oxygen reduction reaction under both alkaline and acidic conditions. *J Am Chem Soc* **2014**, *136* (31), 11027-33.
5. Jiang, X.; Chen, J.; Lyu, F.; Cheng, C.; Zhong, Q.; Wang, X.; Mahsud, A.; Zhang, L.; Zhang, Q., In situ surface-confined fabrication of single atomic Fe-N<sub>4</sub> on N-doped carbon nanoleaves for oxygen reduction reaction. *Journal of Energy Chemistry* **2021**, *59*, 482-491.
6. Wu, D.; Liu, W.; Hu, J.; Zhu, C.; Jing, H.; Zhang, J.; Hao, C.; Shi, Y., Direct transformation of raw biomass into a Fe-N<sub>x</sub>-C single-atom catalyst for efficient oxygen reduction reaction. *Materials Chemistry Frontiers* **2021**, *5* (7), 3093-3098.



7. Chen, Y.; Ji, S.; Wang, Y.; Dong, J.; Chen, W.; Li, Z.; Shen, R.; Zheng, L.; Zhuang, Z.; Wang, D.; Li, Y., Isolated Single Iron Atoms Anchored on N-Doped Porous Carbon as an Efficient Electrocatalyst for the Oxygen Reduction Reaction. *Angew Chem Int Ed Engl* **2017**, *56* (24), 6937-6941.
8. Wang, B.; Wang, X.; Zou, J.; Yan, Y.; Xie, S.; Hu, G.; Li, Y.; Dong, A., Simple-Cubic Carbon Frameworks with Atomically Dispersed Iron Dopants toward High-Efficiency Oxygen Reduction. *Nano Lett* **2017**, *17* (3), 2003-2009.
9. Wang, M.; Yang, W.; Li, X.; Xu, Y.; Zheng, L.; Su, C.; Liu, B., Atomically Dispersed Fe–Heteroatom (N, S) Bridge Sites Anchored on Carbon Nanosheets for Promoting Oxygen Reduction Reaction. *ACS Energy Letters* **2021**, *6* (2), 379-386.
